# Supplementary material
Source: PubMed Central journal article supplement (PMC6752029)
Supplement: AEM.00829-19-s0001.pdf [file AEM.00829-19-s0001.pdf]

1 Supplementary information file

2 **Biopearling of interconnected outer membrane vesicle chains by a marine**  
3 **flavobacterium**

4

5 Tanja Fischer<sup>1</sup>, Martin Schorb<sup>2</sup>, Greta Reintjes<sup>3</sup>, Androniki Kolovou<sup>2</sup>, Rachel Santarella-  
6 Mellwig<sup>2</sup>, Stephanie Markert<sup>4</sup>, Erhard Rhiel<sup>5</sup>, Sten Littmann<sup>6</sup>, Dörte Becher<sup>7</sup>, Thomas  
7 Schweder<sup>4</sup>, Jens Harder<sup>1\*</sup>

8

9 <sup>1</sup>Department of Microbiology, Max Planck Institute for Marine Microbiology, Bremen,  
10 Germany

11 <sup>2</sup>Electron Microscopy Core Facility, EMBL Heidelberg, Heidelberg, Germany

12 <sup>3</sup>Department of Molecular Ecology, Max Planck Institute for Marine Microbiology, Bremen,  
13 Germany

14 <sup>4</sup>Pharmaceutical Biotechnology, University of Greifswald, Greifswald, Germany

15 <sup>5</sup>Institute for Chemistry and Biology of the Marine Environment, Carl von Ossietzky  
16 University of Oldenburg, Oldenburg, Germany

17 <sup>6</sup>Department of Biogeochemistry, Max Planck Institute for Marine Microbiology, Bremen,  
18 Germany

19 <sup>7</sup>Department for Microbial Proteomics, University of Greifswald, Greifswald, Germany

20

21 \* Address correspondence to Jens Harder, [jharder@mpi-bremen.de](mailto:jharder@mpi-bremen.de)

22

23 **This supplementary information file contains:**

24 Supplementary methods

25 Supplementary tables S1-S7

26 Supplementary figures S1-S12

27

28 **Supplementary methods:**

29 **Preparation of outer membranes**

30 For outer membrane preparation following Shetty *et al.* (2011), the cell pellet was  
31 resuspended in 5 ml of KCl/Tris buffer (100 mM KCl, 50 mM Tris, pH 7.5) and sonicated for  
32 6 min on ice (6 pulses of 1min, 30 W, Bandelin Sonoplus HD70, Bandelin, Berlin, Germany).  
33 The lysate was centrifuged at 10 000x g for 10 min in a Beckman 70.1 Ti rotor (Beckman L-  
34 70 ultracentrifuge, Beckman Coulter, Brea, USA) and the supernatant was filtered through a  
35 0.2 µm filter. The filtrate was centrifuged at 40 000x g (Beckman 70.1 Ti rotor) for 60 min.  
36 The pellet was resuspended in 1 ml 2% (w/v) sarkosyl, incubated at 21 °C for 30 min and  
37 centrifuged at 40 000x g (Beckman 70.1 Ti rotor) for 90 min. The OM pellet was dissolved in  
38 the aforementioned KCl/Tris buffer. After Møller *et al.* (2005) a whole cell pellet was  
39 resuspended in 6 ml buffer (20 mM Tris/HCl, 16 mM EDTA, pH 8) and disrupted by  
40 sonication (4 pulses of 1 min, 30 W). Undisrupted cells were removed by centrifugation at  
41 8000x g for 10 min (Beckman 70.1 Ti rotor) and the supernatant was centrifuged at 20 590x g  
42 for 1.5 h. The pellet containing both membranes was resuspended in 1 ml 0.5% (w/v) sarkosyl  
43 in 20 mM Tris/HCl (pH 7.2) and kept on ice for 20 min until centrifugation at 20 590x g for  
44 1 h. This step was repeated, before the OM pellet was washed twice in the aforementioned  
45 KCl/Tris buffer. OM isolation after Koßmehl *et al.* (2013) was performed by resuspending  
46 whole cells in 1 ml lysis buffer (100 mM Tris/HCl (pH 7.5), 10% glycerol, 0.5 mM DDT) and  
47 250 units DNase I and disrupting the cells using a One shot (Constant systems, Daventry,  
48 UK). Cell debris was removed by centrifugation 4390x g for 15 min. The supernatant  
49 received 20 ml of ice-cold 100 mM Na<sub>2</sub>CO<sub>3</sub> and was incubated stirring on ice for 1.5 h. The  
50 total membrane fraction was collected by ultracentrifugation at 200 000x g for 1 h (Beckman  
51 70.1 Ti rotor). The membrane pellet was resuspended in 1 ml lysis buffer (see above) and  
52 ultracentrifuged at 104 000x g for 1 h. The pellet was resuspended in 600 µL 1% sarkosyl

53 (w/v) in the KCl/Tris buffer and incubated 40 min at 1400 rpm and 22 °C. The suspension  
54 was ultracentrifuged at 104 000x g for 1 h. The OM pellet was resuspended in 200 µL IEF  
55 buffer (7 M urea, 2M thiourea, 4% w/v CHAPS, 30 mM Tris pH 8) to solubilize OM proteins.  
56 Insoluble material was removed by centrifugation at 20 000x g for 30 min. According to  
57 McCaig *et al.* (2013), a cell pellet was resuspended in 20 ml of the above mentioned KCl/Tris  
58 buffer and the suspension was centrifuged at 5000x g for 30 min. The pellet was resuspended  
59 in 10 ml 20 mM Tris/HCl (pH 8) and centrifuged at 10 000x g for 20 min. Then, the pellet  
60 was resuspended in 1 ml of a mixture of 20 mM Tris, 20% (w/v) sucrose, 15 mM EDTA and  
61 200 µg lysozyme and incubated on ice for 40 min before 26 mM MgCl<sub>2</sub> x 6 H<sub>2</sub>O and 200 units  
62 DNase I were added and incubated 20 min on ice. Spheroblasted bacteria were pelleted at  
63 10 000x g for 20 min, afterwards resuspended in 1 ml KCl/Tris buffer and sonicated (4 pulses,  
64 1 min each, 30 W). The suspension was centrifuged at 8000x g for 10 min to remove  
65 unbroken cells. The supernatant was ultracentrifuged at 100 000x g (Beckman 70.1 Ti rotor)  
66 for 1 h to pellet the membranes. The membrane pellet was resuspended in 20 mM Tris/HCl  
67 pH 8 with 0.5% sarkosyl (w/v) to solubilize the cytoplasmic membrane. The suspension was  
68 ultracentrifuged at 100 000x g for 1 h to pellet the OM. After method 1 of Thein *et al.* (2010)  
69 a whole cell pellet was resuspended in 500 µL 0.2 M Tris/HCl (pH 8), 1 M sucrose, 1 mM  
70 EDTA and 100 µL of lysozyme (5 mg/ml). The mixture was vortexed and incubated for 5 min  
71 at 21 °C, and then 2 ml water was added and incubated for 20 min to generate spheroblasts. A  
72 solution of 3 ml 50 mM Tris/HCl pH 8, 2% sarkosyl, 10 mM MgCl<sub>2</sub> and 150 units DNase I  
73 were added and incubated for 20 min. Ultracentrifugation at 85 000x g (Beckman 70.1 Ti  
74 rotor) for 30 min yielded the OM pellet, which was washed in 750 µL 50 mM Tris/HCl (pH  
75 8), 2% w/v sarkosyl, 10 mM MgCl<sub>2</sub> and centrifuged as aforementioned. The pellet was  
76 washed three times with 500 µL water and the final OM pellet was resuspended in 500 µL of  
77 the KCl/Tris buffer. Following method 2 of Thein *et al.* (2010) whole cells were resuspended  
78 in 6 mL 0.1 M Tris/HCl (pH 7.3) and 150 units DNase I. Cells were lysed by French<sup>TM</sup>  
79 pressing (SLM Aminco R FA-078, SLM instruments, Urbana, USA) three times at 8.6 MPa  
80 and the cell lysate was centrifuged at 4390x g for 15 min. Seven mL supernatant were mixed  
81 with ice-cold 0.1 M Na<sub>2</sub>CO<sub>3</sub> (pH 11) to a final volume of 70 mL and stirred for 1 h at 4 °C.  
82 The OM was obtained by ultracentrifugation at 120 000x g (Beckman 70.1 Ti rotor) for 1 h.  
83 The OM fraction was washed three times by an ultracentrifugation at 85 000x g for 20 min  
84 and suspended in 500 µL water. Finally the OM was suspended in 500 µL KCl/Tris buffer.  
85 OM after Kulkarni *et al.* (2014) was obtained by cell lysis: a cell pellet was dissolved in 5 mL  
86 of 20% w/v sucrose and 30 mM Tris (pH 8.0), 0.3 mg lysozyme and 50 units DNase I. The

87 suspension was sonicated for 6 min on ice (6 pulses of 1min, 30 W, Bandelin Sonoplus  
88 HD70). Cell debris was removed by centrifugation (4390x g, 10 min). The supernatant was  
89 applied on a sucrose gradient (20-70% w/v) and centrifuged at 158 000x g for 5 h (Beckman  
90 70.1 Ti rotor).

91

## 92 **Preparation of vesicle fractions**

93 Vesicles were prepared by several techniques. Following Kulkarni *et al.* (2014), cultures were  
94 shaken by hand for 10 s and then cells were pelleted in 50mL-tubes for 15 min at 4390x g and  
95 4 °C. The supernatant was filtered through a 0.2 µm syringe filter and ultracentrifuged at  
96 142 019x g for 2 h at 4 °C in a Beckman 70.1 Ti rotor. Pelleted vesicles were resuspended in  
97 the KCl/Tris buffer. According to Shetty *et al.* (2011) cultures were shaken for 30 s and cells  
98 removed by centrifugation with 4390x g for 20 min. The supernatant was filtered twice  
99 through a 0.2 µm filter and was centrifuged for 60 min at 15 000x g (Beckman 70.1 Ti rotor).  
100 The vesicles were obtained by ultracentrifugation at 140 000x g for 2 h. For the method  
101 according to Møller *et al.* (2005), vesicles were removed from a cell pellet by resuspension in  
102 the KCl/Tris buffer. After removal of the cells by centrifugation at 6000x g for 15 min  
103 (method1) or 8000x g, 10 min (Beckman 70.1 Ti rotor) (method 2), the supernatant was  
104 filtered through a 0.2 µm filter and centrifuged at 20 590x g for 100 min (Beckman 70.1 Ti  
105 rotor). The pellet was washed twice with the KCl/Tris buffer. Vortexing for 30 s was the  
106 mechanical stress to resolve vesicles according to Remis *et al.* (2014), followed by cell  
107 removal (5000x g, 10 min), filtration through a 0.2 µm filter and ultracentrifugation at  
108 140 000x g for 1 h (Beckman 70.1 Ti rotor). McCaig *et al.* (2013) included after cell pelleting  
109 a clarification at 7500x g for 20 min (Beckman 70.1Ti rotor) before filtration through a  
110 0.2 µm filter and ultracentrifugation at 100 000x g for 1h (Beckman 70.1 Ti rotor). The pellet  
111 was washed twice with 1 mL of the KCl/Tris buffer.

112

## 113 **Sodium dodecyl sulfate polyacrylamide gel electrophoresis (SDS-PAGE)**

114 SDS-PAGE was conducted to visualize protein patterns of different samples of outer  
115 membrane and vesicle preparations. Proteins were separated in a 12% separation gel (1.75 mL  
116 water, 1.25 mL 4x separation buffer (1.5 M TRIS pH 8.8, 0.4% w/v SDS), 2 mL 30%  
117 acrylamide/bis-acrylamide solution 19:1, 50 µL 10% (w/v) ammoniumpersulfate (APS), 5 µL  
118 tetramethylethylenediamine (TEMED)) and a 4% stacking gel (1.41 mL water, 0.75 mL 4x  
119 stacking buffer (0.5 M Tris pH 8.8, 0.4% w/v SDS), 0.33 mL 30% acrylamide/bis-acrylamide  
120 solution 19:1, 30 µL 10% (w/v) APS, 3 µL TEMED) using the Bio-Rad (Bio-Rad, Munich,

121 Germany) system. Prior to loading on the gel, 20  $\mu$ L of sample was mixed with 6.5  $\mu$ L  
122 loading buffer (0.2 M Tris/HCl pH 6.8, 10% w/v SDS, 10 mM DTT, 20% w/v glycerol,  
123 0.05% w/v bromophenol blue), heated to 95°C for 5 minutes and centrifuged shortly (13817x  
124 g, 1 min). The PageRuler Unstained Protein Ladder (Fermentas, Burlington, Canada) was  
125 used to calibrate the size of the protein bands. Gel electrophoresis was performed for 20  
126 minutes at 70 V to obtain a uniform front and a voltage of 110 V was applied until the front  
127 reached the end of the gel. The gel was stained for 1.5 h with Coomassie staining solution (0.  
128 025% (w/v) Coomassie G 250; 10% (v/v) glacial acetic acid; 40% (v/v) ethanol) and excess  
129 color was removed with 20% ethanol for several hours. The gel was washed in water for 1h  
130 before it was documented using a scanner (Image Scanner, Amersham Biosciences).

131

### 132 **Matrix-assisted laser desorption/ionization - time of flight - mass spectroscopy (MALDI-** 133 **TOF-MS)**

134 Protein bands of interest were cut out of an SDS-gel and placed into an Eppendorf tube  
135 containing 20  $\mu$ L PCR-water. The proteins in the gel were digested with trypsin and applied  
136 onto a MALDI-target (Ettan Spot Handling Workstation, GE Healthcare, Little Chalfont,  
137 UK). The analysis using tandem mass spectrometry (MS/MS) was conducted with a 4800  
138 MALDI-TOF/TOF Analyzer (Applied Biosystems, Darmstadt, Germany). Masses from 900  
139 to 3700 Da were detected. The detected peptides were matched onto the *in silico* predicted  
140 peptides from the genome of strain Hel3\_A1\_48. Open reading frames were predicted by  
141 RAST (Aziz *et al.*, 2008). The sequences of the detected ORFs were blasted with PSIBLAST  
142 (Altschul *et al.*, 1990) using the BLOSUM 80 matrix against the NCBI database of non-  
143 redundant protein sequences and cross-checked with the pfam database (Punta *et al.*, 2012).

144

145 **Supplementary tables:**

146 **Supplementary Table S1:** MALDI-TOF-MS protein identification of strain Hel3\_A1\_48  
 147 OM [A] and vesicle/appendage preparations [B]. Numbers on the left are corresponding to the  
 148 numbered, excised and analyzed protein bands of the SDS-PAGE (Fig. S10). Annotation  
 149 according to NCBI and Blast.

| <b>Band</b> | <b>Protein ID</b> | <b>Annotation</b>                                                         |
|-------------|-------------------|---------------------------------------------------------------------------|
| <b>A</b>    |                   |                                                                           |
| 1           | AOR25966          | TonB-dependent receptor                                                   |
| 2           | AOR26448          | TonB-dependent receptor                                                   |
| 3           | AOR25288          | Protein with peptidoglycan binding domain similar to OmpA                 |
| 4           | AOR25711          | Transporter                                                               |
| 5           | AOR25254          | OM-channels superfamily, putative beta-barrel porin-2                     |
| 6           | AOR26266          | TonB-dependent receptor                                                   |
| 7           | AOR25738          | Protein with unknown function                                             |
| 8           | AOR25929          | Phosphopyruvate hydratase (enolase)                                       |
| 9           | AOR26723          | OM-channels superfamily, putative beta-barrel porin-2                     |
| 10          | AOR25530          | Elongation factor Tu                                                      |
| 11          | AOR26932          | Molecular chaperone Dnak, HSP 70                                          |
| <b>B</b>    |                   |                                                                           |
| 1           | AOR25966          | TonB-dependent receptor                                                   |
| 2           | AOR26448          | TonB-dependent receptor                                                   |
| 4           | AOR25711          | Transporter                                                               |
| 5           | AOR25254          | OM-channels superfamily, putative beta-barrel porin-2                     |
| 6           | AOR26266          | TonB-dependent receptor                                                   |
| 7           | AOR25738          | Protein with unknown function                                             |
| 9           | AOR26723          | OM-channels superfamily, putative beta-barrel porin-2                     |
| 12          | AOR25680          | T9SS C-terminal target domain-containing protein with lamin tail domain   |
| 13          | AOR25736          | Gliding motility protein GldJ                                             |
| 14          | AOR26642          | Gliding motility protein GldK                                             |
| 15          | AOR26575          | DUF5017 domain protein                                                    |
| 16          | AOR26645          | Gliding motility protein GldN                                             |
| 17          | AOR25720          | Hypothetical protein                                                      |
| 18          | AOR26233          | DUF2490 domain-containing protein, outer membrane beta barrel superfamily |
| 19          | AOR26075          | TonB-dependent receptor                                                   |
| 20          | AOR26302          | Protein with peptidoglycan binding domain similar to OmpA                 |
| 21          | AOR26574          | TonB-dependent receptor                                                   |
| 22          | AOR26571          | TonB-dependent receptor                                                   |
| 23          | AOR25658          | Peptidase M1 family containing bacterial aminopeptidase N                 |

150

151

152

153 **Supplementary Table S2:** Subcellular localization of proteins of strain Hel3\_A1\_48 based  
154 on PSORTb predictions using the amino acid sequences encoded in the genome and the  
155 numbers of identified proteins in the four different fractions analyzed in this study. VE vesicle  
156 fraction exponential phase, VS vesicle fraction stationary phase, ME membrane fraction  
157 exponential phase, MS membrane fraction stationary phase.

|                             | <b>Genome</b> | <b>VE</b> | <b>VS</b> | <b>ME</b> | <b>MS</b> |
|-----------------------------|---------------|-----------|-----------|-----------|-----------|
| <b>Total proteins</b>       | 1866          | 374       | 285       | 1310      | 1075      |
| <b>Cytoplasm</b>            | 895           | 136       | 73        | 748       | 642       |
| <b>Cytoplasmic membrane</b> | 319           | 34        | 14        | 190       | 136       |
| <b>Extracellular</b>        | 29            | 14        | 13        | 21        | 14        |
| <b>Outer membrane</b>       | 74            | 59        | 58        | 66        | 65        |
| <b>Periplasm</b>            | 17            | 8         | 9         | 14        | 12        |
| <b>Unknown</b>              | 532           | 123       | 118       | 271       | 206       |

158

159

160

161 **Supplementary Table S3:** Abundant proteins of strain Hel3\_A1\_48. Relative protein  
 162 abundance (NSAF%) values for proteins of each of the four fractions are listed. The sum of  
 163 NSAF% values for all proteins in each fraction, for proteins with an NSAF%  $\geq 0.4$  per  
 164 fraction and the localization of these proteins (NSAF%  $\geq 0.4$ ) according to PSORTb 3.0.2 are  
 165 shown. Other percentages were calculated based on the abundant proteins (NSAF%  $\geq 0.4$ )  
 166 representing 100%. VE vesicle fraction exponential phase, VS vesicle fraction stationary  
 167 phase, ME membrane fraction exponential phase, MS membrane fraction stationary phase.

|                                             | VE    | %    | VS    | %    | ME    | %    | MS    | %    |
|---------------------------------------------|-------|------|-------|------|-------|------|-------|------|
| <b>All proteins</b>                         | 96.11 |      | 99.27 |      | 99.98 |      | 99.82 |      |
| <b>Proteins NSAF% <math>\geq 0.4</math></b> | 59.83 | 100  | 74.34 | 100  | 28.35 | 100  | 32.00 | 100  |
| <b>Cytoplasm</b>                            | 8.23  | 13.8 | 6.46  | 8.7  | 11.87 | 41.9 | 7.25  | 22.7 |
| <b>Cytoplasmic membrane</b>                 | 6.60  | 11.0 | 8.11  | 10.9 | 3.70  | 13.1 | 4.97  | 15.5 |
| <b>Extracellular</b>                        | 1.60  | 2.7  | 1.25  | 1.7  | 0     | 0    | 0.64  | 2    |
| <b>Outer membrane</b>                       | 21.94 | 36.7 | 27.42 | 36.9 | 5.82  | 20.5 | 6.82  | 21.3 |
| <b>Periplasm</b>                            | 0     | 0    | 1.35  | 1.8  | 0     | 0    | 0.41  | 1.3  |
| <b>Unknown</b>                              | 21.46 | 35.9 | 29.76 | 40.0 | 6.96  | 24.6 | 11.92 | 37.3 |

168

169



170 **Supplementary Table S4:** Selected marker proteins for subcellular localizations: Detected  
 171 proteins from the proteome were analyzed with PSORTb to predict their localization. From  
 172 that, a minimum of 10 proteins for each localization were picked and literature search was  
 173 performed to confirm the localization. The sums of the NSAF% values of the marker proteins  
 174 for each localization were calculated for all four samples. They were used to calculate the  
 175 ratios for the abundance of proteins from each localization in the four samples (presented in  
 176 table S7). VE vesicle fraction exponential phase, VS vesicle fraction stationary phase, ME  
 177 membrane fraction exponential phase, MS membrane fraction stationary phase.

| Accession Number    | Annotation                                     | VE           | VS [NSAF%]   | ME           | MS           | Localization PSORTb  |
|---------------------|------------------------------------------------|--------------|--------------|--------------|--------------|----------------------|
| AOR25932            | DNA-directed RNA polymerase subunit alpha      | 0.142        | 0            | 0.254        | 0.225        | Cytoplasmic          |
| AOR26673            | Glutaminyl-tRNA synthetase                     | 0.106        | 0.170        | 0.129        | 0.229        | Cytoplasmic          |
| AOR25523            | DNA-directed RNA polymerase subunit beta       | 0.083        | 0            | 0.225        | 0.218        | Cytoplasmic          |
| AOR25522            | DNA-directed RNA polymerase subunit beta prime | 0.077        | 0.010        | 0.335        | 0.215        | Cytoplasmic          |
| AOR26332            | Phenylalanyl-tRNA synthetase subunit alpha     | 0.048        | 0            | 0.114        | 0.093        | Cytoplasmic          |
| AOR26899            | Histidyl-tRNA synthetase                       | 0.044        | 0            | 0.068        | 0.105        | Cytoplasmic          |
| AOR26378            | Methionyl-tRNA formyltransferase               | 0.031        | 0            | 0.028        | 0.088        | Cytoplasmic          |
| AOR26094            | Glycyl-tRNA synthetase                         | 0.027        | 0            | 0.038        | 0.112        | Cytoplasmic          |
| AOR25945            | 50S ribosomal protein L5                       | 0.271        | 0            | 0.601        | 0.339        | Cytoplasmic          |
| AOR25961            | 30S ribosomal protein S7                       | 0.267        | 0            | 0.271        | 0.151        | Cytoplasmic          |
| AOR26257            | 30S ribosomal protein S2                       | 0.219        | 0            | 0.568        | 0.323        | Cytoplasmic          |
| AOR25943            | 30S ribosomal protein S8                       | 0.214        | 0            | 0.187        | 0.160        | Cytoplasmic          |
| AOR26083            | 50S ribosomal protein L21                      | 0.212        | 0            | 0.509        | 0.329        | Cytoplasmic          |
| AOR25935            | 30S ribosomal protein S13                      | 0.201        | 0            | 0.204        | 0.100        | Cytoplasmic          |
| AOR25756            | 50S ribosomal protein L20                      | 0.190        | 0.038        | 0.242        | 0.224        | Cytoplasmic          |
| AOR25526            | 50S ribosomal protein L1                       | 0.181        | 0            | 0.456        | 0.223        | Cytoplasmic          |
| AOR25933            | 30S ribosomal protein S4                       | 0.147        | 0            | 0.684        | 0.421        | Cytoplasmic          |
| AOR25525            | 50S ribosomal protein L10                      | 0.135        | 0            | 0.120        | 0.120        | Cytoplasmic          |
| AOR25947            | 50S ribosomal protein L14                      | 0.120        | 0            | 0.191        | 0.062        | Cytoplasmic          |
| AOR25515            | 50S ribosomal protein L19                      | 0.118        | 0.039        | 0.263        | 0.114        | Cytoplasmic          |
| AOR26255            | 50S ribosomal protein L13                      | 0.115        | 0            | 0.168        | 0.139        | Cytoplasmic          |
| AOR25242            | 30S ribosomal protein S1                       | 0.096        | 0            | 0.264        | 0.103        | Cytoplasmic          |
| AOR26010            | 50S ribosomal protein L25                      | 0.094        | 0            | 0.116        | 0.180        | Cytoplasmic          |
| AOR25957            | 50S ribosomal protein L3                       | 0.091        | 0            | 0.211        | 0.249        | Cytoplasmic          |
| AOR25942            | 50S ribosomal protein L6                       | 0.078        | 0            | 0.266        | 0.276        | Cytoplasmic          |
| AOR25941            | 50S ribosomal protein L18                      | 0.073        | 0            | 0.123        | 0.125        | Cytoplasmic          |
| AOR25954            | 50S ribosomal protein L2                       | 0.038        | 0            | 0.198        | 0.084        | Cytoplasmic          |
| <b>Sum of NSAF%</b> |                                                | <b>3.419</b> | <b>0.257</b> | <b>6.834</b> | <b>5.007</b> | Cytoplasmic          |
| AOR26407            | ATP FOF1 synthase subunit B                    | 0.194        | 0.096        | 0.460        | 0.768        | Cytoplasmic membrane |

|                     |                                                       |              |              |              |              |                      |
|---------------------|-------------------------------------------------------|--------------|--------------|--------------|--------------|----------------------|
| <b>AOR25548</b>     | Cell division transporter, ATP-binding protein FtsE   | 0.100        | 0            | 0.090        | 0.092        | Cytoplasmic membrane |
| <b>AOR25815</b>     | Cell division protein FtsH                            | 0.063        | 0            | 0.244        | 0.163        | Cytoplasmic membrane |
| <b>AOR26062</b>     | Cell division protein FtsX                            | 0.051        | 0            | 0.068        | 0.063        | Cytoplasmic membrane |
| <b>AOR26972</b>     | Cell division protein FtsK                            | 0.025        | 0            | 0.113        | 0.099        | Cytoplasmic membrane |
| <b>AOR25746</b>     | Biopolymer transporter ExbB                           | 0.033        | 0            | 0.065        | 0.072        | Cytoplasmic membrane |
| <b>AOR26532</b>     | Cytochrome C                                          | 0.031        | 0.016        | 0.094        | 0.073        | Cytoplasmic membrane |
| <b>AOR26856</b>     | Lipid A export ATP-binding/permease protein MsbA      | 0.041        | 0            | 0.179        | 0.125        | Cytoplasmic membrane |
| <b>AOR25922</b>     | Methionine ABC transporter ATP-binding protein        | 0            | 0.017        | 0.075        | 0.117        | Cytoplasmic membrane |
| <b>AOR26714</b>     | ABC transporter, transmembrane region                 | 0            | 0            | 0.043        | 0.012        | Cytoplasmic membrane |
| <b>AOR25703</b>     | ABC transporter, ATP-binding protein                  | 0            | 0            | 0.044        | 0.011        | Cytoplasmic membrane |
| <b>AOR25921</b>     | ABC transporter, permease                             | 0            | 0            | 0.045        | 0.019        | Cytoplasmic membrane |
| <b>AOR25559</b>     | ABC transporter, permease                             | 0            | 0            | 0.040        | 0.057        | Cytoplasmic membrane |
| <b>AOR25371</b>     | ABC transporter, ATP-binding protein                  | 0            | 0            | 0.036        | 0.017        | Cytoplasmic membrane |
| <b>AOR25233</b>     | Lipoprotein-releasing system ATP-binding protein LolD | 0            | 0            | 0.117        | 0.130        | Cytoplasmic membrane |
| <b>AOR26251</b>     | Cytochrome oxidase subunit III                        | 0            | 0            | 0.147        | 0.104        | Cytoplasmic membrane |
| <b>Sum of NSAF%</b> |                                                       | <b>0.539</b> | <b>0.130</b> | <b>1.861</b> | <b>1.923</b> | Cytoplasmic membrane |
| <b>AOR26993</b>     | T9SS C-terminal target domain-containing protein      | 0.620        | 0.317        | 0.117        | 0            | Extracellular        |
| <b>AOR25487</b>     | T9SS C-terminal target domain-containing protein      | 0.510        | 0.538        | 0.124        | 0.104        | Extracellular        |
| <b>AOR25970</b>     | Peptidase, S8 family                                  | 0.393        | 0.355        | 0.125        | 0.046        | Extracellular        |
| <b>AOR25255</b>     | Peptidase, M28 family                                 | 0.211        | 0.200        | 0.066        | 0.052        | Extracellular        |
| <b>AOR26853</b>     | Endonuclease I                                        | 0.201        | 0.140        | 0.027        | 0.016        | Extracellular        |
| <b>AOR25557</b>     | Peptidase, M28 family                                 | 0.104        | 0.085        | 0.020        | 0.033        | Extracellular        |
| <b>AOR25712</b>     | T9SS C-terminal target domain-containing protein      | 0.051        | 0.025        | 0.013        | 0.006        | Extracellular        |
| <b>AOR26095</b>     | T9SS C-terminal target domain-containing protein      | 0.048        | 0            | 0.005        | 0            | Extracellular        |
| <b>AOR26355</b>     | Peptidase, S8 family                                  | 0.047        | 0.078        | 0.037        | 0.019        | Extracellular        |
| <b>AOR26579</b>     | T9SS C-terminal target domain-containing protein      | 0            | 0            | 0.047        | 0.030        | Extracellular        |
| <b>AOR26771</b>     | Peptidase M22                                         | 0            | 0            | 0.011        | 0            | Extracellular        |
| <b>AOR25374</b>     | T9SS C-terminal target domain-containing protein      | 0            | 0            | 0.004        | 0            | Extracellular        |
| <b>Sum of NSAF%</b> |                                                       | <b>2.185</b> | <b>1.738</b> | <b>0.596</b> | <b>0.305</b> | Extracellular        |
| <b>AOR25897</b>     | TonB-dependent receptor                               | 0.056        | 0.082        | 0.015        | 0.013        | Outer membrane       |

|                     |                                                      |              |              |              |              |                |
|---------------------|------------------------------------------------------|--------------|--------------|--------------|--------------|----------------|
| <b>AOR25517</b>     | TonB-dependent receptor                              | 0.048        | 0.043        | 0.014        | 0.016        | Outer membrane |
| <b>AOR26137</b>     | TonB-dependent receptor                              | 0.048        | 0.174        | 0.060        | 0.090        | Outer membrane |
| <b>AOR26630</b>     | TonB-dependent receptor                              | 0.044        | 0.039        | 0.036        | 0.052        | Outer membrane |
| <b>AOR25546</b>     | TonB-dependent receptor                              | 0.043        | 0.062        | 0.051        | 0.055        | Outer membrane |
| <b>AOR25619</b>     | TonB-dependent receptor                              | 0.036        | 0.018        | 0.008        | 0.011        | Outer membrane |
| <b>AOR25452</b>     | TonB-dependent receptor                              | 0.027        | 0.107        | 0.017        | 0.032        | Outer membrane |
| <b>AOR26017</b>     | TonB-dependent receptor                              | 0.020        | 0.033        | 0.003        | 0.003        | Outer membrane |
| <b>AOR25900</b>     | TonB-dependent receptor                              | 0.010        | 0.011        | 0.005        | 0.003        | Outer membrane |
| <b>AOR25966</b>     | TonB-dependent receptor                              | 1.852        | 3.622        | 1.712        | 1.805        | Outer membrane |
| <b>AOR26448</b>     | TonB-dependent receptor                              | 1.001        | 2.390        | 0.641        | 1.386        | Outer membrane |
| <b>AOR26574</b>     | TonB-dependent receptor                              | 0.622        | 0.656        | 0.297        | 0.393        | Outer membrane |
| <b>AOR26504</b>     | TonB-dependent receptor                              | 0.521        | 0.648        | 0.277        | 0.310        | Outer membrane |
| <b>AOR26266</b>     | TonB-dependent receptor                              | 0.409        | 0.296        | 0.320        | 0.248        | Outer membrane |
| <b>AOR25782</b>     | TonB-dependent receptor                              | 0.307        | 0.232        | 0.049        | 0.126        | Outer membrane |
| <b>AOR26268</b>     | TonB-dependent receptor                              | 0.225        | 0.221        | 0.090        | 0.117        | Outer membrane |
| <b>AOR26075</b>     | TonB-dependent receptor                              | 0.194        | 0.131        | 0.071        | 0.081        | Outer membrane |
| <b>AOR26163</b>     | TonB-dependent receptor                              | 0.179        | 0.251        | 0.106        | 0.103        | Outer membrane |
| <b>AOR26960</b>     | TonB-dependent receptor                              | 0.164        | 0.234        | 0.100        | 0.115        | Outer membrane |
| <b>AOR26571</b>     | TonB-dependent receptor                              | 0.140        | 0.321        | 0.101        | 0.178        | Outer membrane |
| <b>AOR25403</b>     | TonB-dependent receptor                              | 0.091        | 0.143        | 0.072        | 0.092        | Outer membrane |
| <b>AOR26302</b>     | Cell envelope biogenesis protein OmpA                | 0.972        | 2.576        | 1.343        | 1.389        | Outer membrane |
| <b>Sum of NSAF%</b> |                                                      | <b>7.011</b> | <b>12.29</b> | <b>5.390</b> | <b>6.620</b> | Outer membrane |
| <b>AOR26842</b>     | Superoxide dismutase [Cu-Zn]                         | 0.073        | 0.930        | 0.112        | 0.321        | Periplasmic    |
| <b>AOR25498</b>     | Metallophosphatase                                   | 0            | 0            | 0.016        | 0.017        | Periplasmic    |
| <b>AOR25512</b>     | PDZ domain-containing protein                        | 0.209        | 0.136        | 0.092        | 0.044        | Periplasmic    |
| <b>AOR25581</b>     | LysM peptidoglycan-binding domain-containing protein | 0.339        | 0.099        | 0.065        | 0.016        | Periplasmic    |
| <b>AOR25888</b>     | Beta-glucosidase                                     | 0.011        | 0.051        | 0.012        | 0.018        | Periplasmic    |
| <b>AOR26084</b>     | Insulinase family protein                            | 0.231        | 0.416        | 0.106        | 0.158        | Periplasmic    |
| <b>AOR26305</b>     | Superoxide dismutase                                 | 0            | 0            | 0.123        | 0.414        | Periplasmic    |
| <b>AOR26519</b>     | Glycosylasparaginase                                 | 0            | 0            | 0.006        | 0            | Periplasmic    |
| <b>AOR26592</b>     | Cytochrome-c peroxidase                              | 0.091        | 0.029        | 0.016        | 0            | Periplasmic    |

|                     |                                           |              |              |              |              |             |
|---------------------|-------------------------------------------|--------------|--------------|--------------|--------------|-------------|
| <b>AOR26730</b>     | Alkaline phosphatase                      | 0.036        | 0.027        | 0.039        | 0.042        | Periplasmic |
| <b>AOR26806</b>     | S9 family peptidase                       | 0            | 0            | 0.034        | 0.009        | Periplasmic |
| <b>AOR26842</b>     | Superoxide dismutase family protein       | 0.073        | 0.930        | 0.112        | 0.321        | Periplasmic |
| <b>AOR26862</b>     | ABC transporter substrate-binding protein | 0            | 0.008        | 0.017        | 0.012        | Periplasmic |
| <b>Sum of NSAF%</b> |                                           | <b>1.065</b> | <b>2.625</b> | <b>0.748</b> | <b>1.372</b> | Periplasmic |

178

179

180

181 **Supplementary Table S5:** Ratios between the four fractions for the different localizations  
 182 were calculated based on NSAF% values of specific marker proteins (see supplementary table  
 183 S6) for the localizations. VE vesicle fraction exponential phase, VS vesicle fraction stationary  
 184 phase, ME membrane fraction exponential phase, MS membrane fraction stationary phase.

| <b>PSORTb</b>               | <b>VE/VS</b> | <b>ME/VE</b> | <b>MS/VS</b> | <b>ME/MS</b> |
|-----------------------------|--------------|--------------|--------------|--------------|
| <b>Cytoplasm</b>            | 13.32        | 2.00         | 19.50        | 1.36         |
| <b>Cytoplasmic membrane</b> | 4.15         | 3.45         | 14.80        | 0.97         |
| <b>Extracellular</b>        | 1.26         | 0.27         | 0.18         | 1.96         |
| <b>Outer membrane</b>       | 0.57         | 0.77         | 0.54         | 0.81         |
| <b>Periplasm</b>            | 0.41         | 0.70         | 0.52         | 0.55         |

185

186

187

188

189

190 **Supplementary Table S6:** Detection of type IX secretion system (T9SS) components:  
 191 Proteins of the T9SS in the genome of strain Hel3\_A1\_48 and detection in the proteomic  
 192 analysis. Localization was predicted by PSORTb 3.0.2 and the manual localization is based  
 193 on the model proposed by McBride & Nakane (2015). VE vesicle fraction exponential phase,  
 194 VS vesicle fraction stationary phase, ME membrane fraction exponential phase, MS  
 195 membrane fraction stationary phase.

| Accession Number | Annotation                                                      | VE    | VS<br>[NSAF%] | ME    | MS    | Localization PSORTb | Localization model        |
|------------------|-----------------------------------------------------------------|-------|---------------|-------|-------|---------------------|---------------------------|
| AOR25736         | Gliding motility protein GldJ                                   | 3.687 | 3.168         | 0.182 | 0.196 | OuterMembrane       | OM + periplasm            |
| AOR26642         | Gliding motility protein GldK                                   | 3.347 | 2.605         | 0.198 | 0.189 | Cytoplasmic         | OM + periplasm            |
| AOR26645         | Gliding motility protein GldN                                   | 2.615 | 2.859         | 0.156 | 0.145 | Cytoplasmic         | OM + periplasm            |
| AOR25738         | PorV                                                            | 2.179 | 3.286         | 0.288 | 0.212 | OuterMembrane       | OM                        |
| AOR25874         | SprT, similar to PorT family protein                            | 0.975 | 0.432         | 0.051 | 0.060 | Unknown             | OM                        |
| AOR26643         | Gliding motility protein GldL                                   | 0.874 | 0.256         | 1.545 | 2.432 | Unknown             | CM + cytoplasm+ periplasm |
| AOR26184         | T9SS membrane protein PorP/SprF                                 | 0.592 | 1.131         | 0.110 | 0.064 | OuterMembrane       | OM                        |
| AOR26556         | Outer membrane protein beta-barrel domain (porT family protein) | 0.436 | 0.576         | 0.064 | 0.011 | OuterMembrane       | OM                        |
| AOR25784         | T9SS membrane protein PorP/SprF                                 | 0.325 | 0.140         | 0.020 | 0     | Unknown             | OM                        |
| AOR25737         | PorU                                                            | 0.188 | 0.216         | 0.042 | 0.040 | Unknown             | OM                        |
| AOR26644         | Gliding motility protein GldM                                   | 0.128 | 0.031         | 0.392 | 0.320 | Unknown             | CM + periplasm            |
| AOR26400         | SprE, similar to TPR domain protein                             | 0.088 | 0.037         | 0.038 | 0.027 | OuterMembrane       | OM + periplasm            |
| AOR26544         | Gliding motility-related protein SprA                           | 0.055 | 0.032         | 0.078 | 0.076 | Unknown             | OM                        |
| AOR26618         | Gliding motility protein GldB                                   | 0.037 | 0.105         | 0.037 | 0.052 | Cytoplasmic         | OM + periplasm            |
| AOR26578         | T9SS membrane protein PorP/SprF                                 | 0     | 0.472         | 0.166 | 0.041 | Unknown             | OM                        |
| AOR25315         | Gliding motility protein GldI                                   | 0     | 0             | 0.022 | 0     | Unknown             | OM + periplasm            |
| AOR26597         | Gliding motility protein GldD                                   | 0     | 0             | 0.007 | 0     | Unknown             | OM + periplasm            |
| AOR26185         | SprB (adhesin)                                                  | 0     | 0             | 0     | 0     | OuterMembrane       | OM                        |

|                 |                                   |       |       |       |       |                     |                |
|-----------------|-----------------------------------|-------|-------|-------|-------|---------------------|----------------|
|                 | similar to PKD domain protein     |       |       |       |       |                     |                |
| <b>AOR26428</b> | Gliding motility lipoprotein GldH | 0     | 0     | 0     | 0     | CytoplasmicMembrane | OM + periplasm |
| /               | RemA (adhesin)                    |       |       |       |       |                     |                |
| /               | SprC                              |       |       |       |       |                     |                |
| /               | SprD                              |       |       |       |       |                     |                |
| /               | GldG                              |       |       |       |       |                     |                |
| /               | GldF                              |       |       |       |       |                     |                |
| /               | GldA                              |       |       |       |       |                     |                |
|                 |                                   | 13.16 | 11.84 | 3.067 | 3.612 |                     |                |

196

197

198 **Supplementary Table S7:** Detection of proteins of strain Hel3\_A1\_48 with a T9SS C-  
 199 terminal secretion tail (TIGR04183) or Bac\_Flav\_CTERM (TIGR04131) domain in the  
 200 genome and the proteomic analysis. NSAF% values of the fractions are displayed, if the  
 201 protein was identified in at least two replicates in one of the samples during proteomic  
 202 analysis. VE vesicle fraction exponential phase, VS vesicle fraction stationary phase, ME  
 203 membrane fraction exponential phase, MS membrane fraction stationary phase.

| <b>Proteins with T9SS C-terminal domain: TIGR04183</b> |                                                  | <b>VE</b>      | <b>VS</b> | <b>ME</b> | <b>MS</b> |
|--------------------------------------------------------|--------------------------------------------------|----------------|-----------|-----------|-----------|
|                                                        |                                                  | <b>[NSAF%]</b> |           |           |           |
| <b>AOR25680</b>                                        | LTD-domain protein                               | 0.693          | 1.875     | 0.406     | 0.465     |
| <b>AOR26993</b>                                        | T9SS C-terminal target domain-containing protein | 0.620          | 0.317     | 0.117     | 0         |
| <b>AOR26484</b>                                        | T9SS C-terminal target domain-containing protein | 0.536          | 0.284     | 0.060     | 0.017     |
| <b>AOR25487</b>                                        | Fibronectin type 3 domain protein                | 0.510          | 0.538     | 0.124     | 0.104     |
| <b>AOR25970</b>                                        | Peptidase, S8 family                             | 0.393          | 0.355     | 0.125     | 0.046     |
| <b>AOR25407</b>                                        | T9SS C-terminal target domain-containing protein | 0.350          | 0.785     | 0.080     | 0.094     |
| <b>AOR25787</b>                                        | Endonuclease I                                   | 0.270          | 0.246     | 0.019     | 0.012     |
| <b>AOR26027</b>                                        | T9SS C-terminal target domain-containing protein | 0.203          | 0.239     | 0.033     | 0.022     |
| <b>AOR26853</b>                                        | Endonuclease I                                   | 0.201          | 0.140     | 0.027     | 0.016     |
| <b>AOR25737</b>                                        | Peptidase, C25 family                            | 0.188          | 0.216     | 0.042     | 0.040     |
| <b>AOR25692</b>                                        | Zinc-dependent metalloprotease                   | 0.083          | 0.021     | 0.006     | 0         |
| <b>AOR25405</b>                                        | Endoglucanase, GH5 (cellulase)                   | 0.065          | 0.042     | 0.007     | 0.004     |
| <b>AOR25421</b>                                        | Phosphoenolpyruvate synthase                     | 0.037          | 0.060     | 0.010     | 0.002     |
| <b>AOR25447</b>                                        | T9SS C-terminal target domain-containing protein | 0.029          | 0         | 0.003     | 0.004     |
| <b>AOR26020</b>                                        | Glycoside hydrolase, GH5 family, CBM6            | 0.020          | 0.008     | 0         | 0         |
| <b>AOR25397</b>                                        | Carbohydrate binding domain protein              | 0.016          | 0         | 0         | 0         |
| <b>AOR26873</b>                                        | DOMON-domain containing protein                  | 0              | 0         | 0.023     | 0.030     |
| <b>AOR25723</b>                                        | T9SS C-terminal target domain-containing protein | 0              | 0         | 0         | 0.013     |
| <b>AOR25893</b>                                        | T9SS C-terminal target domain-containing protein | 0              | 0         | 0         | 0         |
| <b>AOR25438</b>                                        | T9SS C-terminal target domain-containing protein | 0              | 0         | 0         | 0         |
| <b>AOR26291</b>                                        | T9SS C-terminal target domain-containing protein | 0              | 0         | 0         | 0         |
| <b>AOR26016</b>                                        | PKD domain protein                               | 0              | 0         | 0         | 0         |
| <b>AOR26883</b>                                        | Peptidase, M43 family, (metalloprotease),        | 0              | 0         | 0         | 0         |
| <b>AOR25889</b>                                        | Glycosyl hydrolase family                        | 0              | 0         | 0         | 0         |
| <b>AOR25401</b>                                        | Glycoside hydrolase family, GH 30                | 0              | 0         | 0         | 0         |
| <b>AOR25645</b>                                        | DUF1501 domain-containing protein                | 0              | 0         | 0         | 0         |
| <b>AOR26026</b>                                        | Sortilin domain containing protein               | 0              | 0         | 0         | 0         |

204

| <b>Proteins with T9SS C-terminal domain: TIGR04131</b> |                                               | <b>VE</b>      | <b>VS</b> | <b>ME</b> | <b>MS</b> |
|--------------------------------------------------------|-----------------------------------------------|----------------|-----------|-----------|-----------|
|                                                        |                                               | <b>[NSAF%]</b> |           |           |           |
| <b>AOR26617</b>                                        | Gliding motility-associated C-terminal domain | 0.057          | 0.040     | 0.010     | 0.007     |
| <b>AOR25712</b>                                        | Zinc-dependent metalloprotease                | 0.051          | 0.025     | 0.013     | 0.006     |
| <b>AOR26095</b>                                        | L-type lectin                                 | 0.048          | 0         | 0.005     | 0         |
| <b>AOR25373</b>                                        | Gliding motility-associated C-terminal domain | 0.033          | 0.030     | 0.011     | 0.009     |
| <b>AOR25785</b>                                        | PKD domain-containing protein                 | 0.027          | 0         | 0.003     | 0.003     |
| <b>AOR26729</b>                                        | Gliding motility-associated C-terminal domain | 0              | 0.056     | 0.011     | 0.029     |



|                 |                                               |   |   |       |       |
|-----------------|-----------------------------------------------|---|---|-------|-------|
| <b>AOR26579</b> | Fibronectin type 3 domain-containing protein  | 0 | 0 | 0.047 | 0.030 |
| <b>AOR25374</b> | Gliding motility-associated C-terminal domain | 0 | 0 | 0.004 | 0     |
| <b>AOR26185</b> | PKD and CUB domain-containing protein         | 0 | 0 | 0     | 0     |

205

206

207

208

209

210

211

212

213

214

215

216

217

218 **Supplementary figures:**

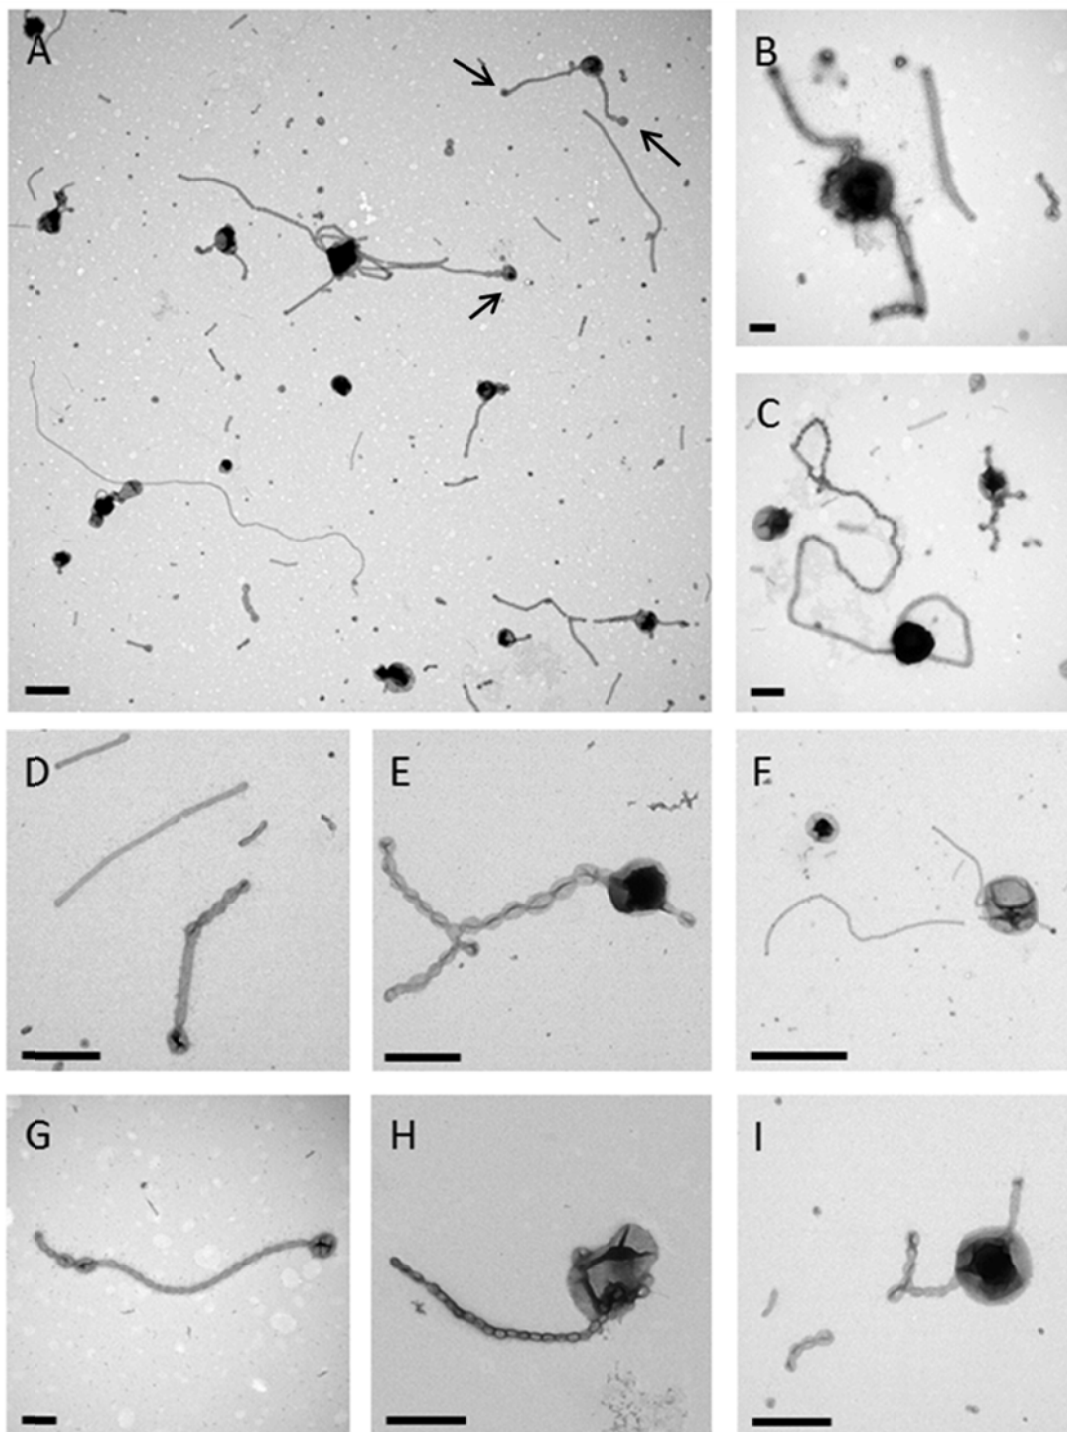

219

220 **Supplementary Fig. S1:** TEM micrographs of strain Hel3\_A1\_48 in stationary growth phase.  
221 Cells grown in HaHa\_100V medium at 21°C to stationary phase were negatively stained with  
222 1% uranyl acetate. Arrows in [A] are pointing to larger vesicles at the distal end of the  
223 appendage (also in [D, G]). Other images show extracellular vesicle chains [A-I] and  
224 membrane tubes [B, D]. Bars correspond to 250 nm [B, G], 500 nm [C, D, E, H, I], 1µm [A]  
225 or 2 µm [F].

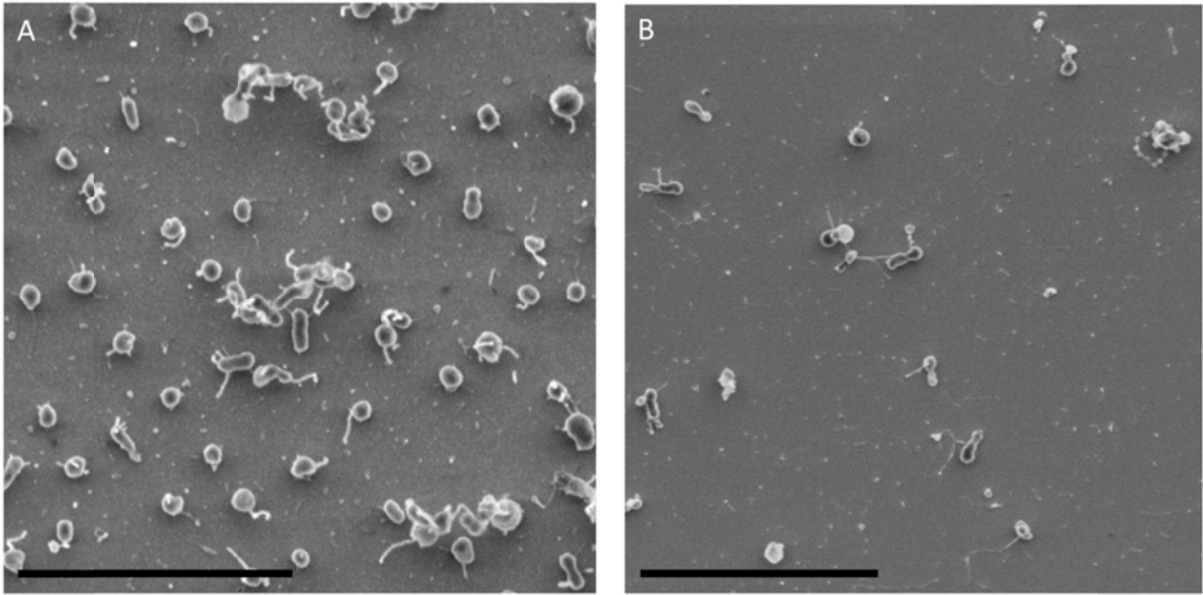

226

227 **Supplementary Fig. S2:** SEM (SE) micrographs of strain Hel3\_A1\_48. Cells grown in  
228 HaHa\_100V medium at 21°C to late exponential [A] or stationary phase [B] were settled on a  
229 silica wafer, dehydrated by an ethanol-series and preserved using critical point drying. Bars  
230 correspond to 4  $\mu\text{m}$  [A] or 5  $\mu\text{m}$  [B].

231

232

233

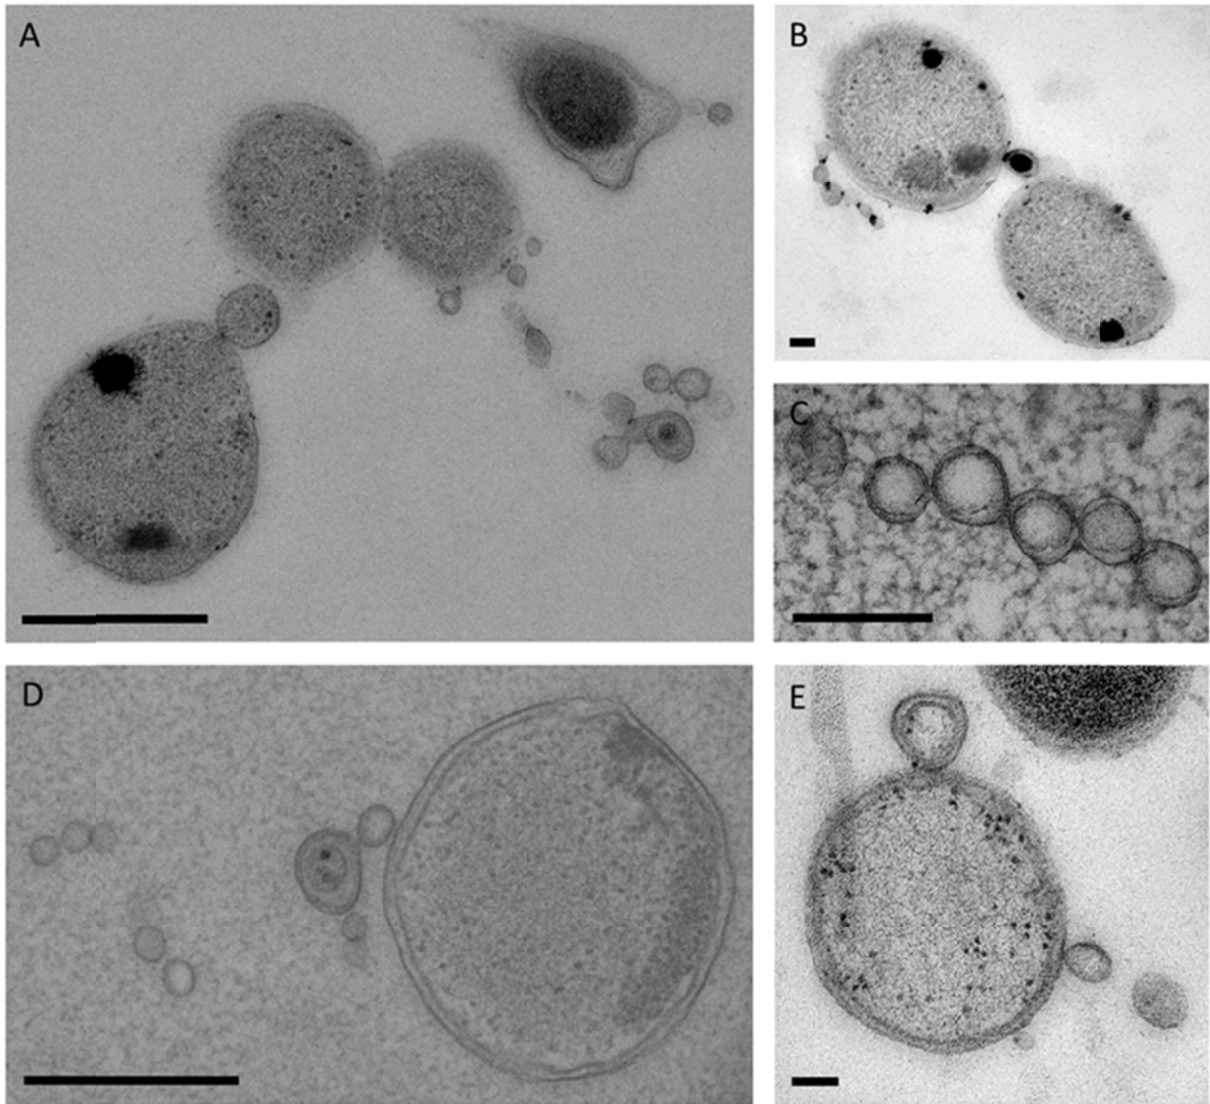

234

235 **Supplementary Fig. S3:** TEM micrographs of 70 nm thin sections of strain Hel3\_A1\_48.  
 236 Cells grown in HaHa\_100V medium at 21°C were pelleted and fixed by high-pressure  
 237 freezing, freeze-substitution and sectioning into 70 nm thin sections. TEM images showed  
 238 cells with and without the storage compound [A, B], OM extensions [A-E], OMVs [A-E], O-  
 239 IMVs [A, D, E] and vesicles with a storage compound [B]. Bars correspond to 100 nm [B, E],  
 240 200 nm [C] and 500 nm [A, D].

241

242

243

244

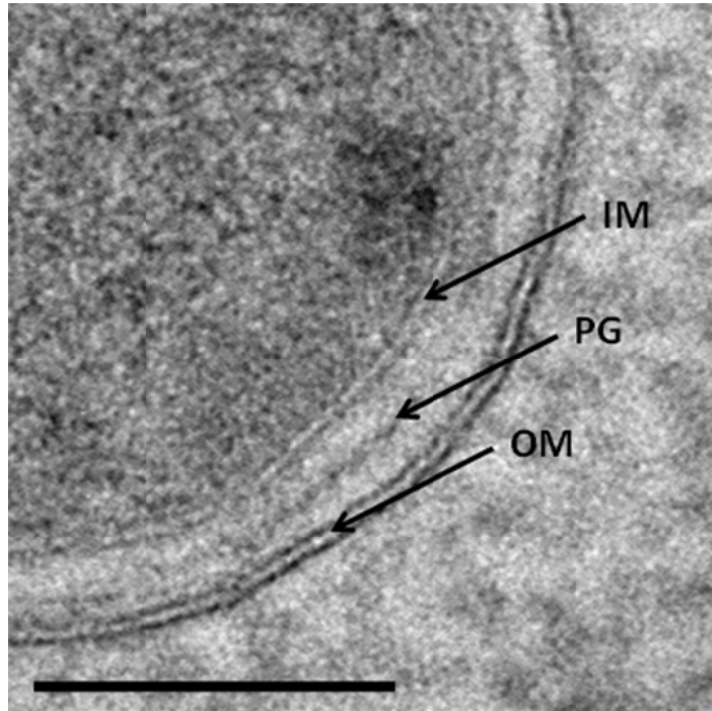

245

246 **Supplementary Fig. S4:** TEM micrograph of a thin section of a strain Hel3\_A1\_48 cell. The  
247 Gram-negative membrane system consists of the inner membrane (IM), the thin  
248 peptidoglycan layer (PG) and the outer membrane (OM). The picture shows an extended  
249 periplasm of around 19-21 nm in width. Bar corresponds to 100 nm.

250

251

252

253

254

255

256

257

258

259

260

261

262

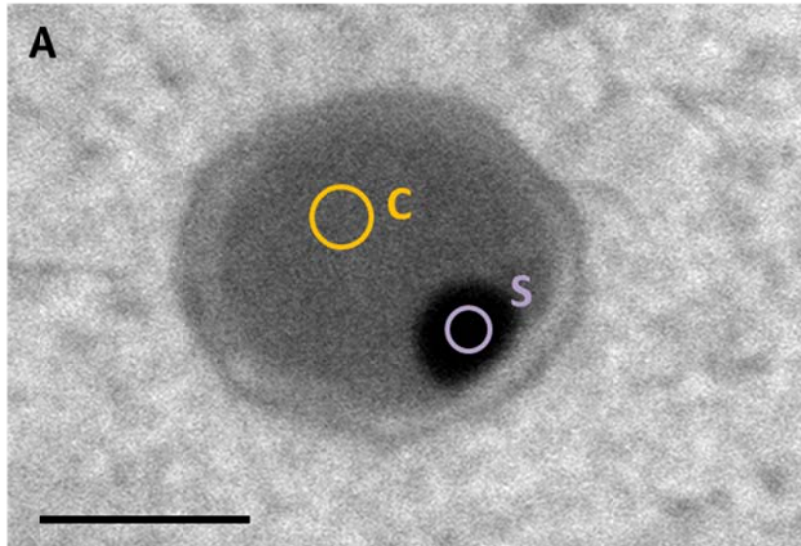

263

264

265

266

267

268

269

270

271

272

273

274

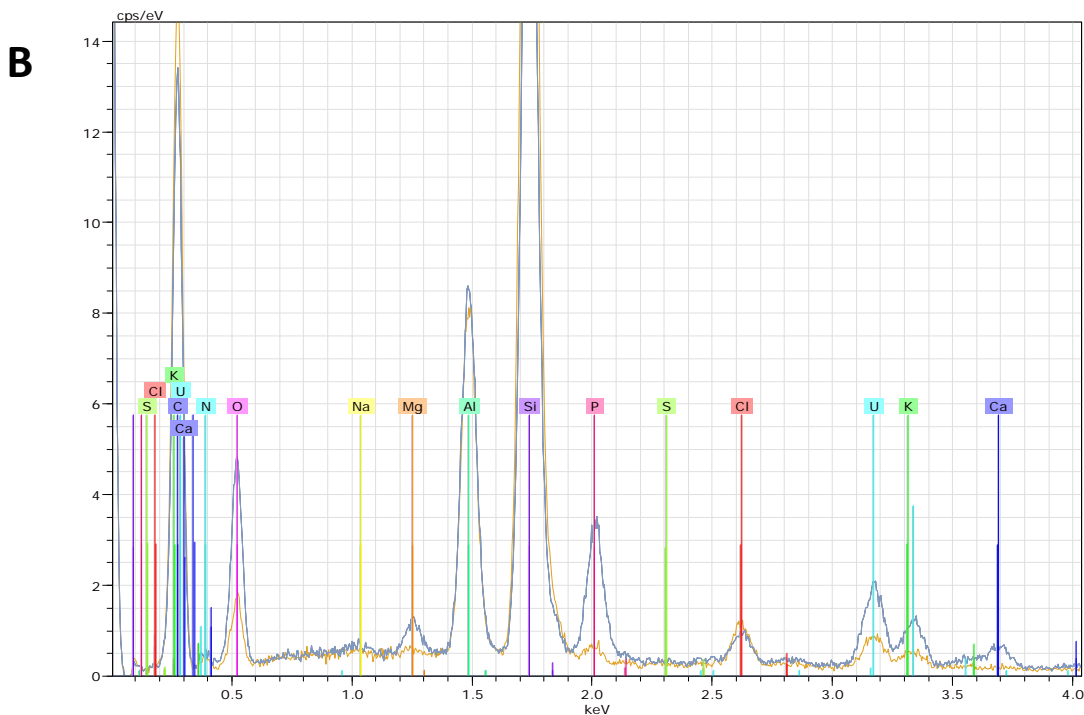

275

276

277

278

279

280

281

282

283

**Supplementary Fig. S5:** Energy-dispersive X-ray (EDX) measurement of 300 nm thin sections of strain Hel3\_A1\_48. The STEM image [A] shows a cell with a storage compound (S) inside and a reference sample site in the cell (C) (magnification: 160 000 x, accelerating voltage (HV): 10.0 kV, working distance: 9.5 mm; bar corresponds to 200 nm). The EDX spectra [B] of the sample sites S [purple spectrum] and C [orange spectrum] revealed an elevated concentration of phosphorus, oxygen, magnesium, calcium, potassium and uranium (uranium from contrasting, aluminum from sample holder, silicon from STEM detector) in the storage compound.

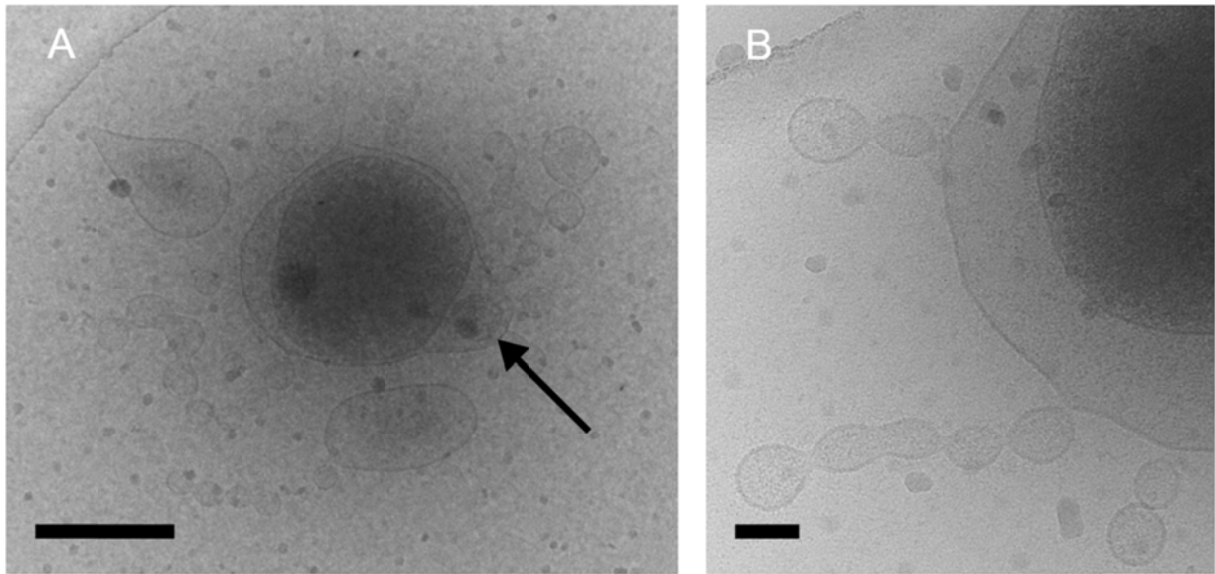

284

285 **Supplementary Fig. S6:** Cryo-EM micrographs of stationary phase cells of strain  
286 Hel3\_A1\_48. Cells grown in HaHa\_100V medium at 21°C were directly frozen on the grid in  
287 liquid ethane. Arrow in [A] points towards the IMV, still enclosed by the outer membrane of  
288 the cell. [B] shows the large periplasm of the cell and associated outer membrane vesicle  
289 chains. Bars represent 500 nm [A] and 100 nm [B].

290

291

292

293

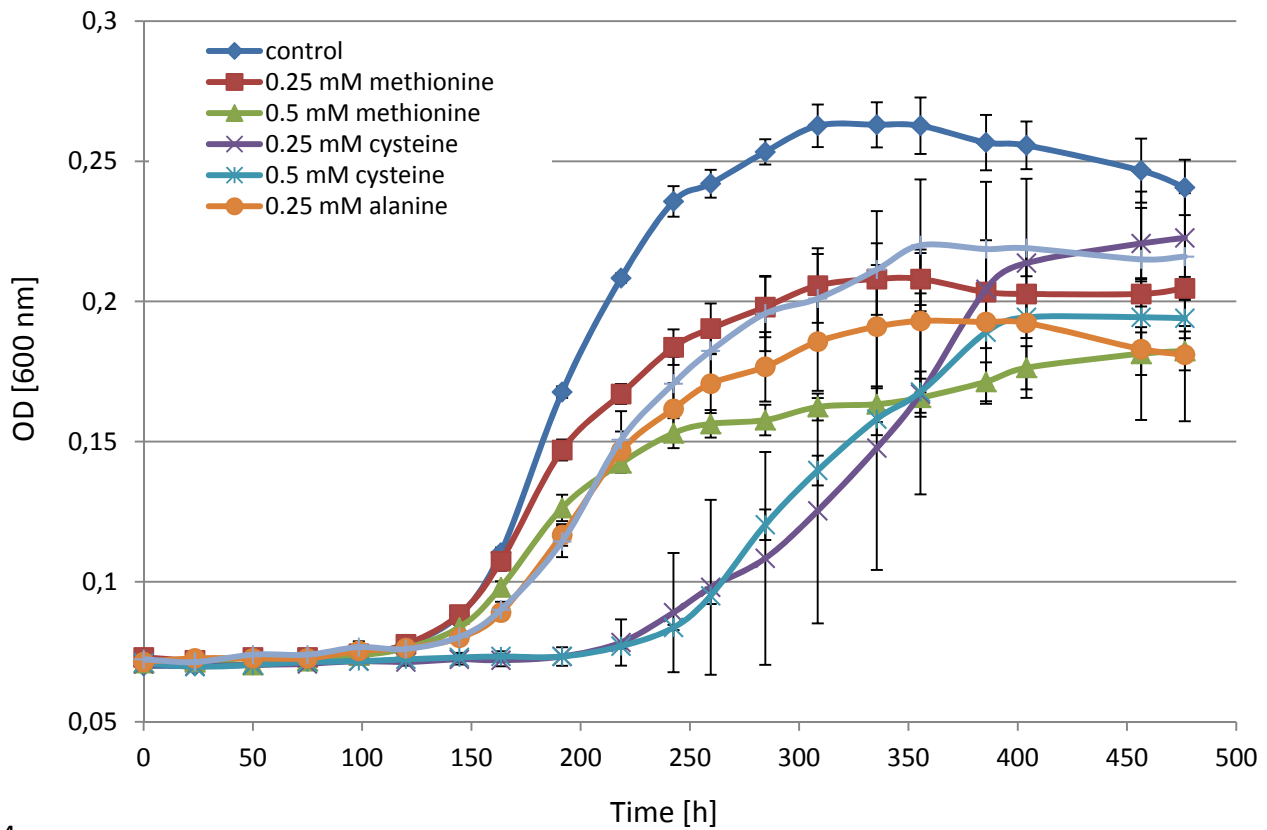

294

295 **Supplementary Fig. S7:** Growth curves of strain Hel3\_A1\_48 in HaHa\_100V medium and  
 296 medium supplemented with different concentrations of the amino acids methionine, cysteine  
 297 and alanine. Cells were grown at 21 °C on a tilting shaker with 55 rpm in 15 ml tubes and the  
 298 optical density was measured at 600 nm.

299

300

301

302

303

304



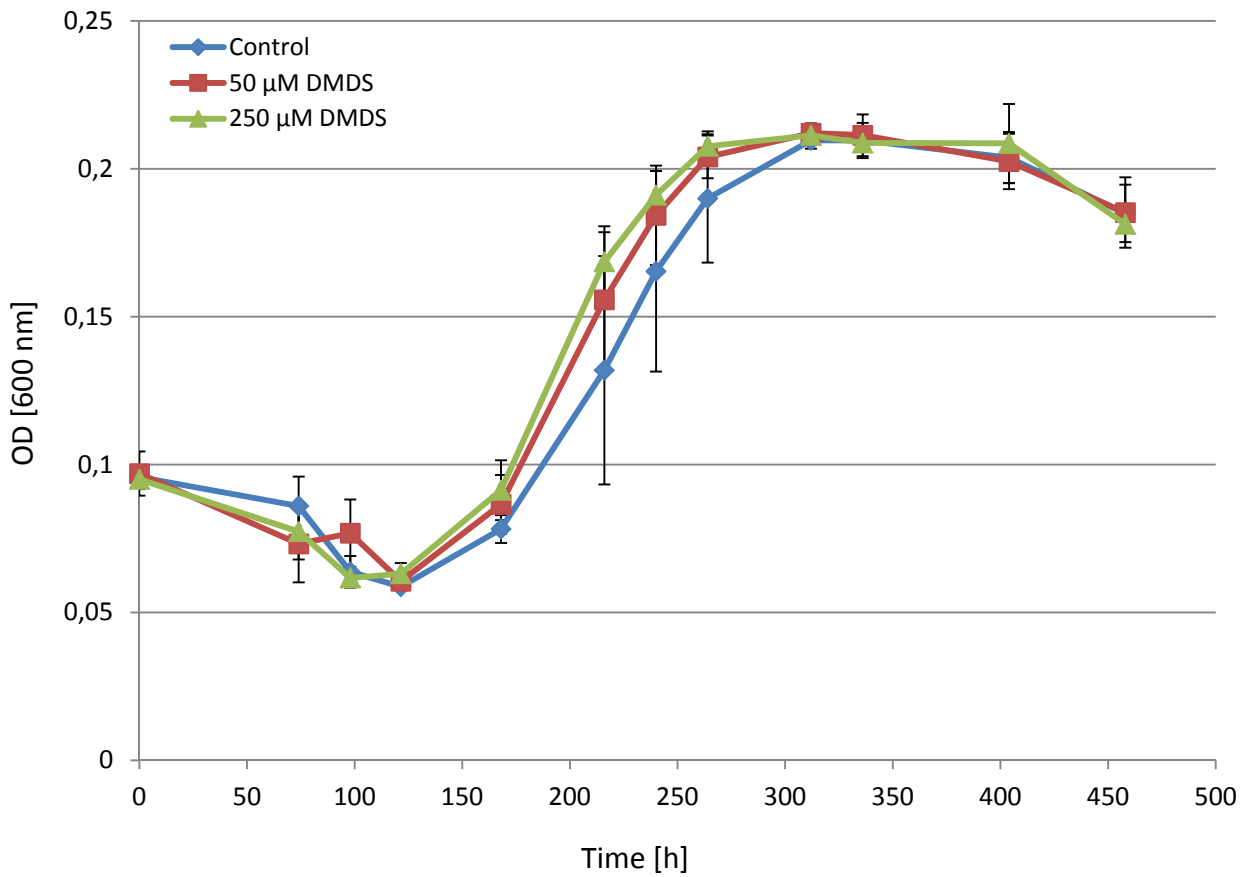

305  
 306 **Supplementary Fig. S8:** Growth curves of strain He13\_A1\_48 in HaHa\_100V medium and  
 307 medium supplemented with different concentrations of DMDS. Cells were grown at 21 °C in  
 308 gastight 1 L Duran bottles with 900 ml headspace and the optical density was measured at  
 309 600 nm.

310

311

312

313

314

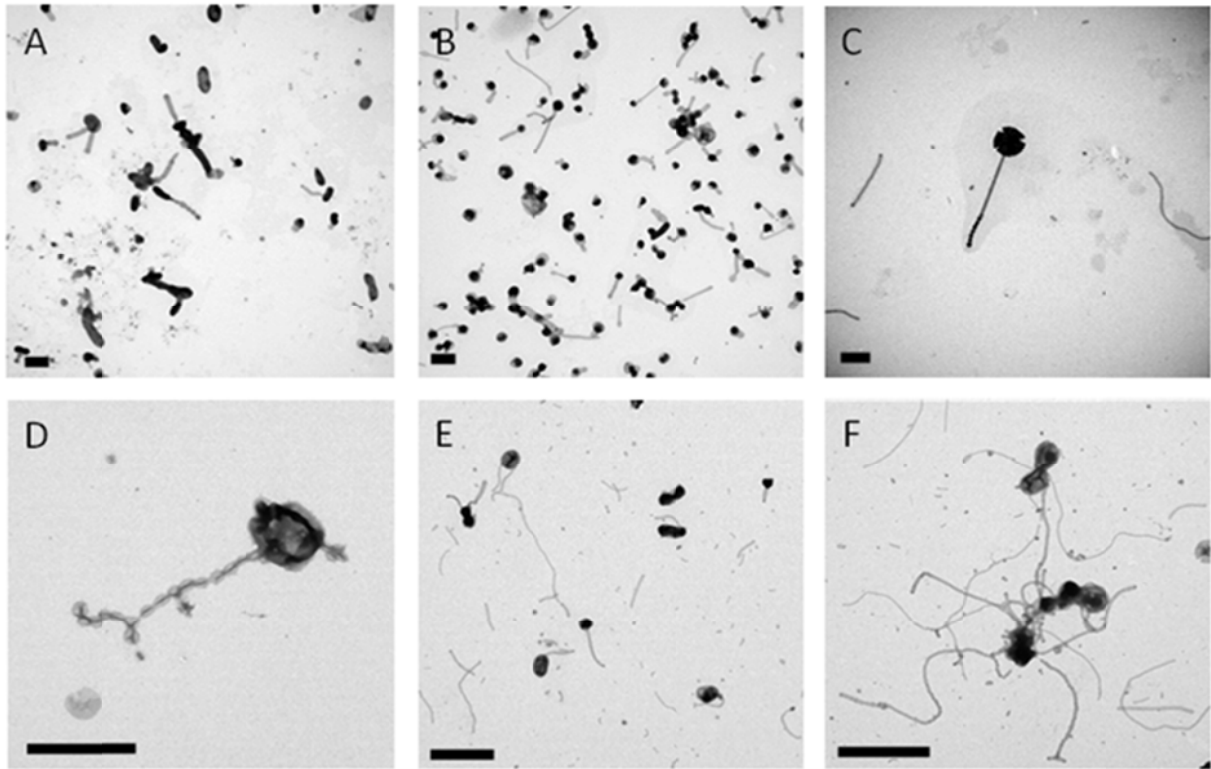

315

316 **Supplementary Fig. S9:** TEM micrographs of strain Hel3\_A1\_48 cells in stationary growth  
317 phase. Cells were grown at 21°C in HaHa\_100V medium with supplemented cysteine [A],  
318 methionine [B], DMDS [C] or with HaHa\_minV only on glucose and casamino acids [D],  
319 plus additional sodium carbonate [E], with HaHa\_minV only on casamino acids [F] or plus  
320 additional sodium carbonate [G]. They were negatively stained with 1% uranyl acetate for  
321 TEM. Bars correspond to 500 nm [C], 1  $\mu$ m [A, B, D] or 2  $\mu$ m [E, F].

322

323

324

325

326

327

328

329

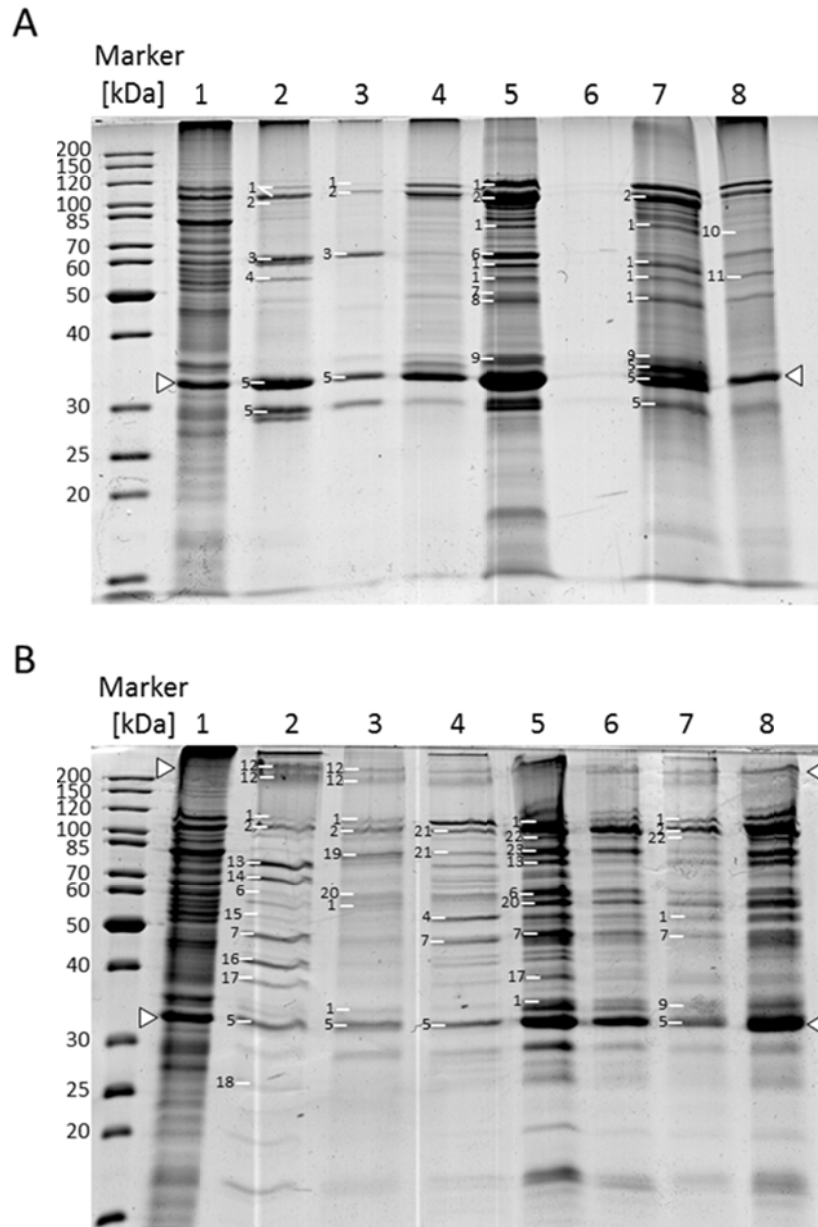

330

331 **Supplementary Fig. S10:** SDS-PAGE images of strain Hel3\_A1\_48 outer membrane (OM)  
 332 preparations [A] and vesicle/appendage preparations [B]. [A1, B1] show whole cell extracts.  
 333 OM fractions were prepared according to Shetty *et al.* (2011) [A2], Møller *et al.* (2005) [A3],  
 334 Koßmehl *et al.* (2013) [A4], McCaig *et al.* (2013) [A5], Thein *et al.* (2010) method 1 [A6],  
 335 Thein *et al.* (2010) method 2 [A7] and Kulkarni *et al.* (2014) [A8]. The vesicle/appendage  
 336 fraction was performed as described by Kulkarni *et al.* (2014) with exponential phase cells  
 337 [B2], Kulkarni *et al.* (2014) with stationary phase cells [B3], Shetty *et al.* (2011) [B4], Møller  
 338 *et al.* (2005) method 1 [B5], Møller *et al.* (2005) method 2 [B6], Remis *et al.* (2014) [B7] and  
 339 McCaig *et al.* (2013) [B8] (see methods for details). Marked bands were excised and analyzed  
 340 by MALDI-TOF-MS. Results are presented in Suppl. Table S1. The triangles denote a 35kDa  
 341 porin (AOR25254) and a lamin tail domain-containing protein with a C-terminal T9SS target  
 342 domain (AOR25680) that had a predicted weight of 61 kDa and appeared to have a molecular  
 343 weight of over 200 kDa in SDS PAGE gel.

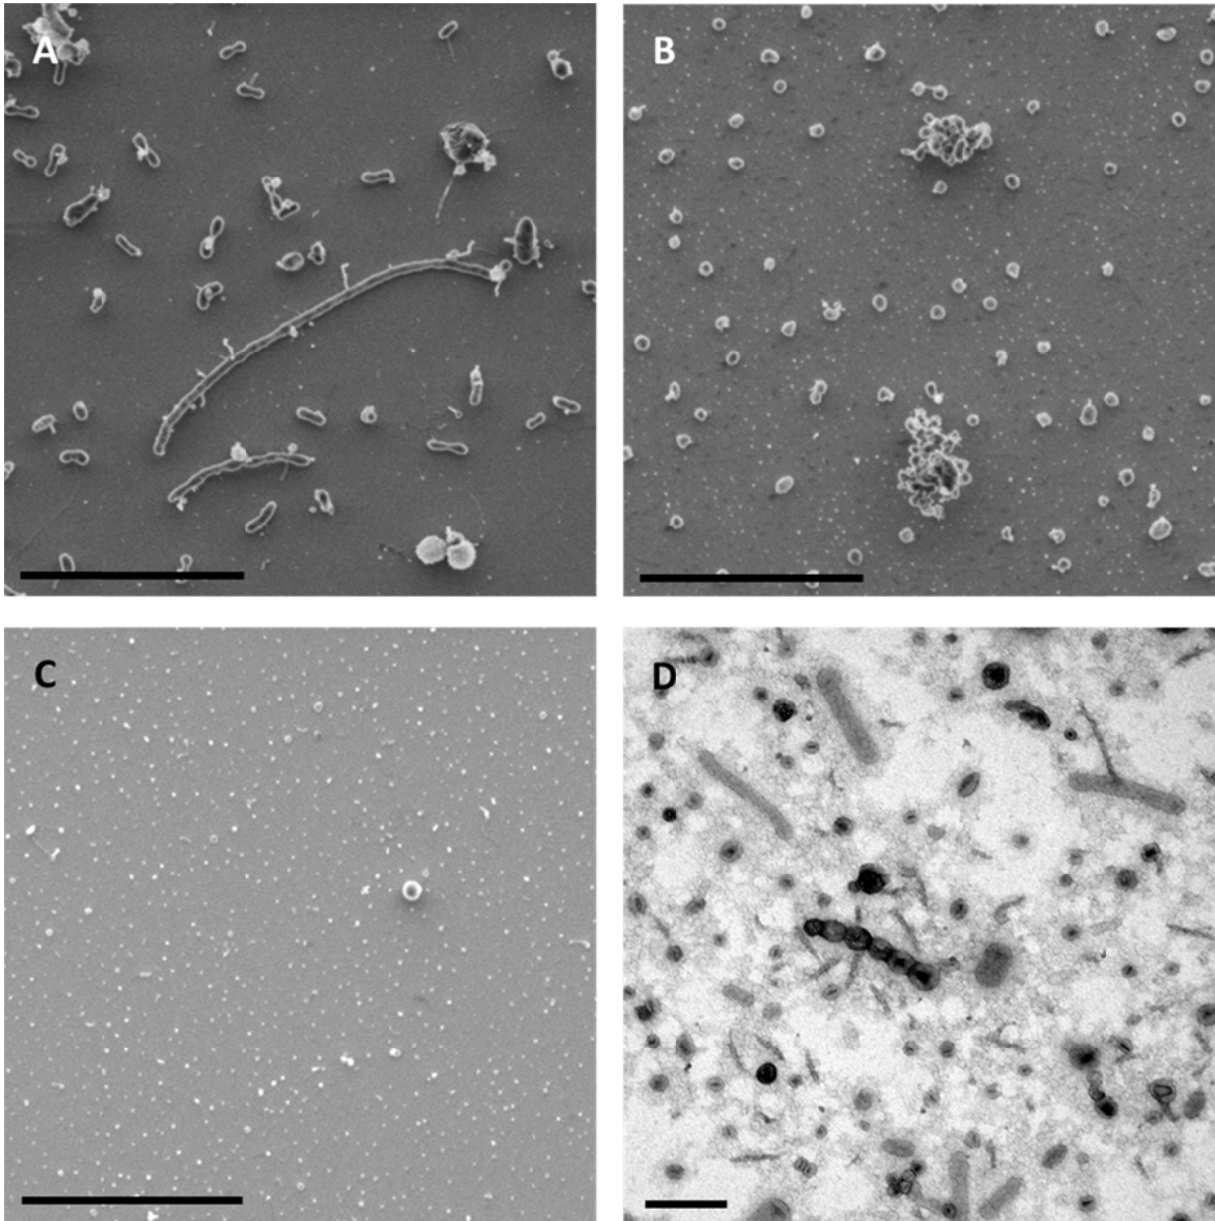

344

345 **Supplementary Fig. S11:** SEM (SE) and TEM images of the cell and vesicle/appendage  
 346 fractions obtained by differential centrifugation and filtration for proteomics. The differential  
 347 centrifugation yielded a pellet (4390x g, 10 min) with whole cells and aggregates [A]. Small  
 348 cells were pelleted with 27 440x g for 15 min [B]. The supernatant was filtered through a  
 349 0.2  $\mu\text{m}$  filter and the filtrate was then centrifuged again using 142 019x g for 2 h. The pellet 3  
 350 consisted then mainly of single vesicles, vesicle chains and tubes [C, D]. Bars in SEM [A-C]  
 351 and TEM images [D] correspond to 5  $\mu\text{m}$  [A, B], 4  $\mu\text{m}$  [C] and 250 nm [D].

352 Due to a larger biomass pellet 1 was used for the crude membrane preparation.

353

354

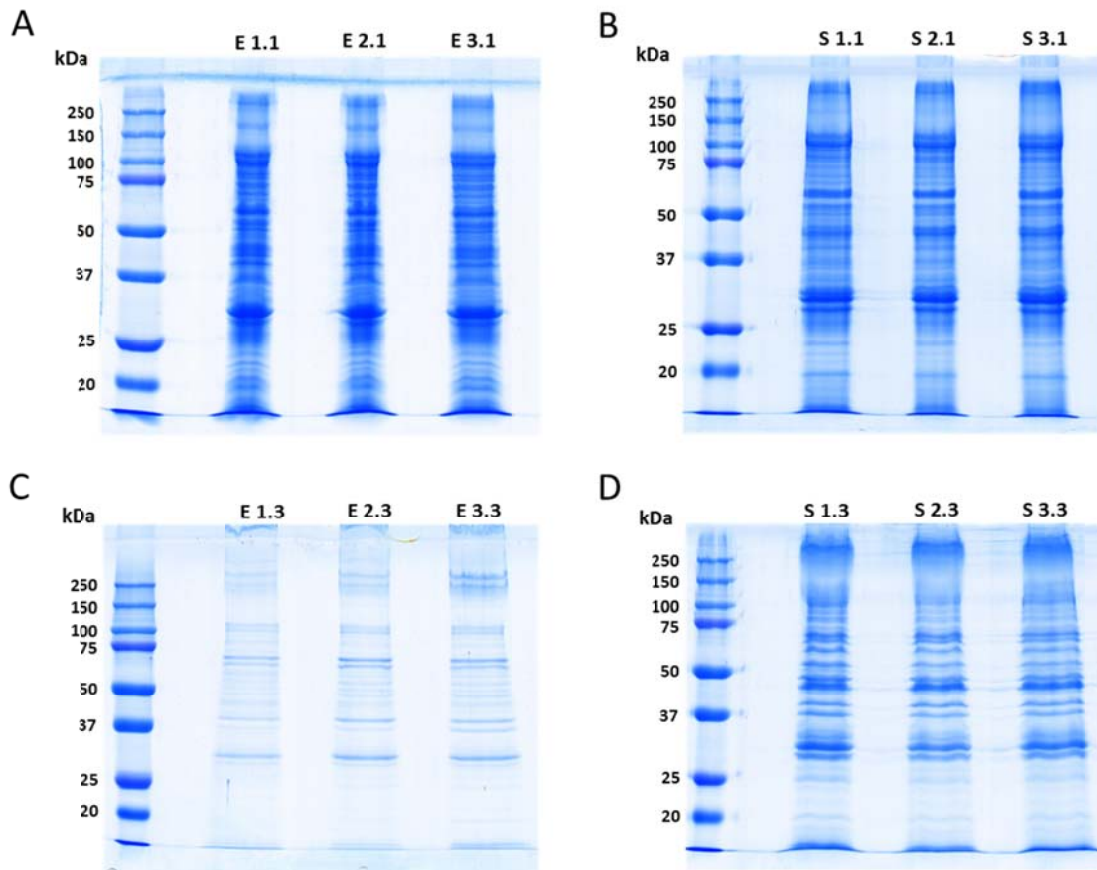

355

356

357 **Supplementary Fig. S12:** SDS-PAGE images of strain Hel3\_A1\_48 protein samples used for  
 358 proteomic analysis by LC-MS/MS. Crude membrane fractions of exponential phase cells [A]  
 359 and of stationary phase cells [B] and the vesicle/appendage fraction of the exponential phase  
 360 [C] and of the stationary phase [D] were each prepared from three cultures.

361

362

363

364

365 **References**

366

367 Altschul SF, Gish W, Miller W, Myers EW, Lipman DJ. Basic local alignment search tool.  
368 Journal of molecular biology. 1990 Oct 5; 215(3):403-10.

369

370 Aziz RK, Bartels D, Best AA, DeJongh M, Disz T, Edwards RA, Formsma K, Gerdes S,  
371 Glass EM, Kubal M, Meyer F. The RAST Server: rapid annotations using subsystems  
372 technology. BMC genomics. 2008 Dec; 9(1):75.

373

374 McBride MJ, Nakane D. 2015. Flavobacterium gliding motility and the type IX secretion  
375 system. Curr Opin Microbiol 28:72-77.

376

377 Koßmehl S, Wöhlbrand L, Drüppel K, Feenders C, Blasius B, Rabus R. Subcellular protein  
378 localization (cell envelope) in *Phaeobacter inhibens* DSM 17395. Proteomics. 2013 Oct;  
379 13(18-19):2743-60.

380

381 Kulkarni HM, Jagannadham MV. Biogenesis and multifaceted roles of outer membrane  
382 vesicles from Gram-negative bacteria. Microbiology. 2014 Oct 1; 160(10):2109-21.

383

384 McCaig WD, Koller A, Thanassi DG. Production of outer membrane vesicles and outer  
385 membrane tubes by *Francisella novicida*. Journal of bacteriology. 2013 Mar 15;  
386 195(6):1120-32.

387

388 Møller JD, Barnes AC, Dalsgaard I, Ellis AE. Characterisation of surface blebbing and  
389 membrane vesicles produced by *Flavobacterium psychrophilum*. Diseases of aquatic  
390 organisms. 2005 May 20; 64(3):201-9.

391

392 Punta M, Coggill PC, Eberhardt RY, Mistry J, Tate J, Boursnell C, Pang N, Forslund K, Ceric  
393 G, Clements J, Heger A. The Pfam protein families database. Nucleic acids research.  
394 2011 Nov 29; 40(D1):D290-301.

395

396 Remis JP, Wei D, Gorur A, Zemla M, Haraga J, Allen S, Witkowska HE, Costerton JW,  
397 Berleman JE, Auer M. Bacterial social networks: structure and composition of

398 *Myxococcus xanthus* outer membrane vesicle chains. Environmental microbiology. 2014  
399 Feb; 16(2):598-610.  
400  
401 Shetty A, Chen S, Tocheva EI, Jensen GJ, Hickey WJ. Nanopods: a new bacterial structure  
402 and mechanism for deployment of outer membrane vesicles. PloS one. 2011 Jun 7;  
403 6(6):e20725.  
404  
405 Thein M, Sauer G, Paramasivam N, Grin I, Linke D. Efficient subfractionation of gram-  
406 negative bacteria for proteomics studies. Journal of proteome research. 2010 Oct 28;  
407 9(12):6135-47.
